## Assessment of the optimum fertilizer rates and planting density for soybean production in China

Jilong Lv<sup>1</sup>, Ping He<sup>1</sup>, Dan Wei<sup>2</sup>, Xinpeng Xu<sup>1</sup>, Shaojun Qiu<sup>1</sup>, Shicheng Zhao<sup>1\*</sup>

<sup>1</sup> Ministry of Agriculture Key Laboratory of Plant Nutrition and Fertilizer, Institute of Agricultural Resources and Regional Planning, Chinese Academy of Agricultural Sciences, Beijing 100081, PR China

<sup>2</sup> Institute of Plant Nutrition and Resources, Beijing Academy of Agricultural and Forestry Sciences, Beijing 100097, PR China

\*Corresponding author. Tel: +86-10-82105029; E-mail: zhaopshicheng@caas.cn

1 **Abstract**

2 Fertilization rate and planting density are important factors affecting crop yield. A large number of soybean  
3 [*Glycine max* (L.) Merr] field experimental data (1998-2017) were collected through different database  
4 sources to evaluate the optimum fertilizer rate and planting density for high yield of spring and summer  
5 soybean in China. The yield of spring and summer soybean gradually increased over year, with their average  
6 yields were 2610 and 2724 kg ha<sup>-1</sup>, respectively. Based on the fitted quadratic curve, the optimal rate of  
7 nitrogen (N), phosphorus (P), and potassium (K) fertilizers for high yield of summer soybean was 96 kg N  
8 ha<sup>-1</sup>, 80 kg P<sub>2</sub>O<sub>5</sub> ha<sup>-1</sup>, and 126 kg K<sub>2</sub>O ha<sup>-1</sup>, and the corresponding yields were 3038, 2801 and 2305 kg ha<sup>-1</sup>,  
9 respectively. The optimal rate of N, P and K fertilizers for spring soybean was 71 kg N ha<sup>-1</sup>, 108 kg P<sub>2</sub>O<sub>5</sub> ha<sup>-1</sup>  
10 and 74 kg K<sub>2</sub>O ha<sup>-1</sup>, and the corresponding yields were 2932, 2834 and 2678 kg ha<sup>-1</sup>, respectively. The  
11 optimum density was 27×10<sup>4</sup> and 34×10<sup>4</sup> plants ha<sup>-1</sup> under high yield for summer and spring soybean,  
12 respectively. Stepwise regression analysis showed that the P fertilizer had the greatest influence on the spring  
13 soybean yield followed by K fertilizer and planting density. For summer soybean, population density had the  
14 major effect on yield followed by P fertilizer. Overall, the P fertilization and planting density should be  
15 payed attention to increase soybean yield in different regions of China.

16

17 **Keywords:** Soybean; Crop yield; Fertilization rate; Planting density;

18

## 19 **Introduction**

20 Soybean [*Glycine max* (L.) Merr] is an important source of high-quality plant protein and edible oil. With  
21 its biological nitrogen-fixing (BNF) capacity, soybean is an important crop in decreasing N fertilizer  
22 application and sustaining high crop yield in the crop rotation system [1]. Soy-based foods such as tofu, soy  
23 milk, soy sauce, and miso have been developed for human consumption [2], and soybean meal is used as  
24 animal feed. As an oil crop, soybean also has a wide range of uses in the industrial field in addition to its  
25 home usage [3].

26 The current total soybean yield is approximately 363 million tons globally, with an average yield of 2782  
27 kg ha<sup>-1</sup>[4], but still cannot meet the need of growing population. The factors influencing high soybean yield  
28 include climatic conditions, soil characteristics, soybean varieties, nutrient management and cultivation  
29 practices [5]. Different climatic conditions (such as temperature variation, sunshine duration, and  
30 precipitation) affect the planting date, grain-filling period and total growth period of crop that ultimately  
31 influence the crop yield [6,7]. Soil characteristics can determine soil nutrient supply capacity and affect crop  
32 growth and yield, because the 2/3 of nutrients absorbed during the crop growing period came from soil and  
33 only 1/3 of nutrients supplied by fertilizers [8]. Nitrogen (N), phosphorus (P), and potassium (K) are  
34 primarily essential nutrients for crop growth [9-11], and balanced fertilization play an important role in  
35 increasing crop yield [12]. The soybean seed with high protein contents has a large demand for N. The  
36 appropriate amount of N fertilizer can enhance the photosynthesis, improve the seed yield, protein, and oil  
37 per unit area. P is involved in the formation of new cells structures, protein synthesis, transportation and  
38 transformation of organic compounds in soybean [13]. P fertilization can effectively improve nodular  
39 symbiosis between legumes and rhizobium species [14,15], with enhancement of the activity of nitrogenase  
40 enzyme during nodulation, and results in N fixation ability of root nodules [16]. K is mainly involved in the

41 formation of carbohydrates in soybean and increases the strength of stems, and its deficiency prolongs the  
42 maturation period and decreases the quality and yield [17]. Appropriate planting density is essential for  
43 increasing soybean yield, because it improves the utilization of light energy in leaves, promotes the nutrient  
44 absorption, and increases the dry matter accumulation with yield [18].

45 China is an important soybean producer and consumer country in the world, but its soybean production is  
46 far from meeting the demand of increasing population, with a deficit of  $8-10 \times 10^7$  tons that imports from  
47 other countries every year [19]. In China, soybean cultivation is divided into spring and summer soybean  
48 according to their sowing time. The spring soybean is mainly concentrated in northeast China with a  
49 monoculture, and the summer soybean is mainly in the north-central China and south China plains [20], with  
50 mainly wheat-soybean rotation. Because of low seed yield (average  $1773 \text{ kg ha}^{-1}$ ) [20], farmers pay less  
51 attention to soybean production in China even knowing its importance. At the same time, it is believed that  
52 soybean can fix N through root nodules and does not need to apply ample amount of N fertilizer; however,  
53 the BNF cannot meet the entire N demand of soybean, especially under high yield. A large number of field  
54 studies on optimum soybean fertilization and planting density were carried out with some recommendations  
55 on fertilization rate and planting density to improve crop yield and nutrient use efficiency [21,22]. However,  
56 these experiments were conducted in individual fields and recommendations only reflect the individual fields  
57 for optimal nutrient management or density. This individual test result is not universal for large regions,  
58 because there are great variations in climate and soil conditions across soybean production areas of China,  
59 and it is necessary to conclude the universal management measure in fertilization and planting density by  
60 summing up earlier study datasets. Therefore, we collected a large number of experimental data including  
61 fertilization rate, planting density, and seed yield of soybean across different production regions from 1993  
62 to 2017. The objective is to obtain the optimum N, P, and K fertilization rate and planting density with

63 consideration of higher yield in main soybean planting areas of China.

## 64 **Materials and methods**

### 65 **Data sources**

66 The database used in this study included field experiments conducted by the International Plant Nutrition  
67 Institute (IPNI) China Program, the Soybean Industrial System Research Database, and papers published in  
68 the China Knowledge Network (CNKI) journal from 1998 to 2017. The field studies did not involve  
69 endangered or protected species, so no specific permissions were required for the location/activity. The  
70 keyword used to access the literature included: soybean, yield, density, and fertilization rate. Total 748 field  
71 experimental data were analyzed in this study, these experiments included “3414” balanced fertilization  
72 experiment, population density and fertilizer rate experiments ([Table1](#)). The distribution of experimental  
73 sites was showed in [Fig.1](#). All field trials were included clear fertilization rates, plant population density, and  
74 seed yield. The soybean test varieties were widely grown locally.

75

76 **Table1.**The type and number of experiment for soybean data collection.

| Experiment types                  | Number of experiment |
|-----------------------------------|----------------------|
| “3414” and balanced fertilization | 635                  |
| Density and fertilization rate    | 24                   |
| Nitrogen fertilizer rate          | 27                   |
| Phosphorus fertilizer rate        | 20                   |
| Potassium fertilizer rate         | 29                   |
| Density experiment                | 13                   |

77

78 **Fig 1.** The location distribution of experiment sites in China.

79

### 80 **Data Analysis**

81 Soybean data was divided into summer and spring soybean based on the sowing date (summer soybean is  
82 sown in early June and spring soybean is sown in later April or early May) for further analysis. The data with  
83 harvest index value less than 0.4 kg kg<sup>-1</sup> were excluded because they were assumed that the crop suffered  
84 abiotic or biotic stresses other than nutrient deficiency during the growing season [1]. The soybean seed yield  
85 derived from the optimum practical treatment (N, P, and K were recommended based on soil testing) was  
86 used to evaluate the yield change and average yield within 20 years. Soybean seed yield was adjusted to 135  
87 g kg<sup>-1</sup> moisture content. The quadratic function of seed yield corresponding to different rates of N, P, K  
88 fertilizers, and planting density were fitted to determine the optimum rate for fertilization and planting  
89 density with Microsoft Excel. Stepwise multiple regression analysis ( $p < 0.05$ ) was applied to detect the  
90 factors influencing yield by using SPSS 19.0 version (SPSS, Inc., Chicago, IL, USA).

## 91 **Results**

### 92 **Soybean yield change**

93 The seed yield of spring and summer soybean gradually increased from 1998 to 2017, and the increased rate  
94 was higher in summer than spring soybean, and the summer soybean presented higher average seed yield  
95 (2724 kg ha<sup>-1</sup>) relative to spring soybean (2610 kg ha<sup>-1</sup>) (Fig.2). The yield of summer and spring soybean  
96 were mainly concentrated ranged in 2000–3000 kg ha<sup>-1</sup>, presenting 46.4% and 59.8% of the yield data  
97 followed by 3,000-4,000 kg ha<sup>-1</sup>, accounting for 31.4% and 23.1%, respectively (Fig. 3). The yield variation  
98 of summer soybean was larger than that of spring soybean.

99

100 **Fig 2.** Change in average seed yield for summer and spring soybean from 1998 to 2017. (Yield date from optimum  
101 fertilization treatment. Trend line: solid line for summer soybean and dotted line for spring soybean). Means ±standard  
102 deviation ( $n = 3$ ) are shown.

103 **Fig 3.** Sequences distribution of soybean yield from 1998 to 2017 (Yield date from optimum fertilization treatment)

104 Relationship between soybean yield and fertilization rates.

105 Soybean seed yield showed an increasing-decreasing change with the increasing rate of N, P, and K  
106 fertilizers (Fig. 4). According to the quadratic equation fitted between the fertilizer rate and soybean yield,  
107 when the maximum yield of summer soybean was obtained, the rate of N, P, and K fertilizers was 96 kg N  
108  $\text{ha}^{-1}$ , 80 kg  $\text{P}_2\text{O}_5 \text{ ha}^{-1}$ , and 126 kg  $\text{K}_2\text{O ha}^{-1}$ , respectively, with the corresponding maximum yield 3038, 2801  
109 and 2305 kg  $\text{ha}^{-1}$ , respectively. For the spring soybean, the rate of N, P, and K fertilizers was 71 kg N  
110  $\text{ha}^{-1}$ , 108 kg  $\text{P}_2\text{O}_5 \text{ ha}^{-1}$ , 74 kg  $\text{K}_2\text{O ha}^{-1}$ , respectively, and the corresponding maximum yield was 2932, 2834  
111 and 2678 kg  $\text{ha}^{-1}$ , respectively.

112

113 **Fig 4.** Relationship between soybean seed yield and the rate of N, P, and K fertilization (1998-2017).

114

### 115 **Relationship between planting density and seed yield**

116 The soybean yield also showed an increasing-decreasing change with the increase in planting density (Fig. 5).  
117 According to the fitted curve, the yield of summer and spring soybean was the highest under the density of  
118  $26 \times 10^4$  and  $34 \times 10^4$  plants  $\text{ha}^{-1}$ , the corresponding yields were 2936 and 2791 kg  $\text{ha}^{-1}$ , respectively. The  
119 summer soybean presented higher rate in increase or decrease of yield relative to spring soybean with  
120 increasing planting density, indicating that the yield of summer soybean was greatly affected by the change  
121 in population density relative to spring soybean.

122 **Fig 5.** Relationship between soybean yield and planting density.

### 123 **Relationship between fertilization rate, planting density, and soybean yield**

124 Stepwise regression analysis showed that density had the greatest effect on summer soybean yield, followed  
125 by the P fertilizer rate (Table 2). For spring soybean, the P fertilizer had the greatest effect on yield, followed

126 by K, N fertilizers and planting density. However, the introduction of density in the regression curve  
 127 indicated that planting density and P fertilizer played important roles in high yield, followed by K fertilizer  
 128 in spring soybean area.

129 **Table 2.** Stepwise regression analysis of soybean yield (Y) and planting density, the rate of N, P, and K fertilizers (X).  
 130

| Dependent               | independents | Summer soybean                        |         | Spring soybean                               |         |
|-------------------------|--------------|---------------------------------------|---------|----------------------------------------------|---------|
|                         |              | R value                               | P value | R value                                      | P value |
| Soybean<br>yield<br>(Y) | Density (X1) | 0.578                                 | p=0     | 0.267                                        | p=0.021 |
|                         | N rate (X2)  | 0.061                                 | p=0.454 | 0.331                                        | p=0.001 |
|                         | P rate (X3)  | 0.325                                 | p=0     | 0.426                                        | p=0     |
|                         | K rate (X4)  | 0.041                                 | p=0.169 | 0.343                                        | p=0     |
| Regression equation     |              | Y=2071.92+28.68X1+1.92X3,<br>R= 0.661 |         | Y=2341.63+11.03X1-3.86X3+6.08X4,<br>R= 0.526 |         |

131

## 132 Discussion

133 Due to the genetic improvement in soybean variety, the application of balanced fertilization and other  
 134 agricultural technologies since 1998, the soybean yield increased over years in China. The average yield of  
 135 summer soybean was higher relative to spring soybean, which was mainly related to regional soil fertility  
 136 and climatic condition. Soybean is a short-day thermophilic crop and is sensitive to light and temperature  
 137 [23-25]. Spring soybean grewed in northeast China, which has low average temperature and low rainfall in  
 138 soybean growing season. The summer soybean region has high temperature and precipitation, which is more  
 139 conducive to the soybean growth. Meanwhile, the fertilization rate and soil nutrient content in farmland of  
 140 north-central and south China are higher than those in northeast China [26]. The average yield data might be  
 141 overestimated in this study, because these data are from the experimental fields in the main soybean  
 142 producing areas. The fertilization rate, planting density, and other management practices were scientific in  
 143 these experimental fields; and in fact, the insufficient and unbalanced fertilization and the low planting



144 density extensive existed in farmers' fields of these soybean production areas.

145 Rational application of N, P and K nutrients is the key factor attaining high yield [27-29]. This study  
146 showed that the optimal rate of N, P, K for summer soybean was 96 kg N ha<sup>-1</sup>, 80 kg P<sub>2</sub>O<sub>5</sub> ha<sup>-1</sup>, 126 kg K<sub>2</sub>O  
147 ha<sup>-1</sup>, and these values were 71 kg N ha<sup>-1</sup>, 108 P<sub>2</sub>O<sub>5</sub> ha<sup>-1</sup>, and 74 kg K<sub>2</sub>O ha<sup>-1</sup> for spring soybean, respectively.  
148 These data are deviated from previous results, probably because the earlier researchers have proposed the  
149 appropriate amount of fertilizer based on the results of a single test, only for specific areas. Our study  
150 summarized the multi-year and multi-point test data in different regions, the number of fertilization treatment  
151 and sample were large, the fertilization gradient is dense and with strong reliability. The optimum N and K  
152 fertilizer rates of summer soybean were higher than that of spring soybean. Firstly, the higher attainable yield  
153 of summer soybean required more nutrients; secondly, the soil N and K contents were higher in north-central  
154 relative to northeast China [30]. Soil P are surplus in most area of China, and the surplus was greater in  
155 north-central than northeast China [30-32], while the low temperature in early spring season limits soil P  
156 availability, which cannot meet the P demand of soybean in early growth stag. In order to meet the P demand  
157 for high soybean yield, people increased the P fertilizer inputs; leading to the calculated optimum P fertilizer  
158 rate in spring soybean was higher than that in summer soybean [33-34]. Therefore, how to activate and make  
159 full use of accumulated soil P in early spring in northeast China is also an important research direction for  
160 reducing P fertilization and increasing P use efficiency.

161 The optimum density of spring soybean is higher than that of summer soybean, because the optimum  
162 density of crops is determined by varieties, local climate and environmental conditions, etc. Soybean  
163 close-planting can improve the interception and utilization of light and increase soybean yield. The spring  
164 temperature and the annual effective accumulated temperature are low in northeast China, it is necessary to  
165 increase planting density to make full use of light and heat to attain high yield.

166 Regression analysis showed that P fertilizer and density had great effects on the high yield of spring and  
167 summer soybeans. Because P is an important element for the synthesis of protein and fat in soybean seed,  
168 and P can promote the formation and development of root nodules, the fixation of atmospheric N, the  
169 conversion of ammonia and the formation of amino acids [35,36], as well as promote the absorption of N and  
170 K in soybean [37]. In addition, low soil P availability resulted from low temperature is also an important  
171 reason in spring soybean region. In north-central China, the most of the soils is calcareous with high K  
172 content, and straw return is prevalent and can effectively supplement soil K supply; however, in northeast  
173 China, few of crop straw were returned to soils because of its slow degradation under low temperature, soil  
174 K was rapidly consumed due to crop uptake. Appropriate density can increase the photosynthetic rate and  
175 nutrient absorption of soybean per unit area, thus increasing soybean yield [38]. In north-central China,  
176 soybean was sowed directly with any tillage after wheat harvest, a large number of wheat straw returned to  
177 the fields affects the quality of soybean sowing and seedling rate, the soybean density is general low in actual  
178 production [39].

179 The summer and spring soybean yields under optimum N, P and K rates were higher than the average  
180 soybean yield except for the yield under optimum K rate for summer soybean. At the same time, the summer  
181 and spring soybean yields under the optimum density were higher than their average yields. The results  
182 showed that optimum fertilizer application and reasonable planting density increased soybean yield.  
183 Therefore, we should make optimum fertilization rates and planting density based on different plant areas to  
184 increase yield in the future soybean planting. However, due to the large variation in soil texture and fertility  
185 in spring and summer soybean planting areas, a constant fertilization rate and planting density may not be  
186 suitable across the whole areas, we can adjust these values based on the idea of “large formula and small  
187 adjustment” [40-42] combining with the characters of different regions to attain high soybean yield.

## 188 **Conclusions**

189 Our study found that the seed yield of spring and summer soybean increased over year since 1998 in  
190 China, with a higher average yield for summer soybean as compared to spring soybean. The optimum rate of  
191 N, P and K fertilizers under high yield was 96 kg N ha<sup>-1</sup>, 80 kg P<sub>2</sub>O<sub>5</sub> ha<sup>-1</sup> and 126 kg K<sub>2</sub>O ha<sup>-1</sup> for summer  
192 soybean, and was 71 kg N ha<sup>-1</sup>, 108 kg P<sub>2</sub>O<sub>5</sub> ha<sup>-1</sup>, 74 kg K<sub>2</sub>O ha<sup>-1</sup> for spring soybean, respectively. The  
193 optimum population density for high yield of summer soybean was higher than that of spring soybean.  
194 Planting density is a key factor for high yield of soybean and need to be increased to attain high yield in both  
195 soybean producing areas. We should pay attention to P fertilization in both soybean areas, and the attention  
196 also is needed for K fertilization in the spring soybean area.

## 197 **Acknowledgements**

198 This project was supported by the National Key Research & Development Program of China  
199 (2018YFD0201001 and 2016YFD0200102).

## 200 **References**

- 201 1. Yang FQ, Xu XP, Wang W, Ma JC, Wei D, He P, et al. (2017) Estimating nutrient uptake requirements  
202 for soybean using QUEFTS model in China. *PloS ONE* 12:e0177509.
- 203 2. Nishinari K, Fang Y, Guo S, Phillips GO. (2014) Soy proteins: A review on composition, aggregation  
204 and emulsification. *Food Hydrocolloid* 39:301–318.
- 205 3. Pratap A, Gupta SK, Kumar J, Solanki RK. (2011) Soybean. *Technological Innovations in Major World*  
206 *Oil Crops* 1:293–321.
- 207 4. Cai CZ, Zhang JW, Liang Y. (2018) Analysis of potential yield of global soybean forecasted by ARIMA  
208 Model. *Soybean Sci* 167:129–134 (in Chinese).
- 209 5. Southworth J, Pfeifer RA, Habeck M, Randolph JC, Doering OC, Johnston JJ, et al. (2002) Changes in

- 210 soybean yields in the Midwestern United States as a result of future changes in climate, climate  
211 variability, and CO<sub>2</sub> fertilization. *Clim Change* 53:447–475.
- 212 6. Brown RA, Rosenberg NJ. (1997) Sensitivity of crop yield and water use to change in a range of climatic  
213 factors and CO<sub>2</sub> concentrations: a simulation study applying EPIC to the central USA. *Agr Forest*  
214 *Meteorol* 83:171–203.
- 215 7. Li T, Hasegawa T, Yin X, Zhu Y, Boote K, Adam M, et al. (2014) Uncertainties in predicting rice yield  
216 by current crop models under a wide range of climatic conditions. *Global Change Biol* 21:1328–1341.
- 217 8. Zhao JY, Yu ZW. (2005) Effects of nitrogen rate on nitrogen fertilizer use of winter wheat and content  
218 of soil nitrate-N under different fertility condition. *Acta Eco Sin* 26:815–822 (in Chinese).
- 219 9. Boswell FC, Anderson OE. (1976) Long-term residual fertility and current N-P-K [nitrogen, phosphorus,  
220 potassium] application effects on soybeans. *Agr J* 68:315–318.
- 221 10. Scharf PC, Wiebold WJ, Lory JA. (2002) Corn yield response to nitrogen fertilizer timing and deficiency  
222 level. *Agr J* 94:435–441.
- 223 11. Read JJ, Reddy KR, Jenkins JN. (2006) Yield and fiber quality of upland cotton as influenced by  
224 nitrogen and potassium nutrition. *Eur J Agron* 24:282–290.
- 225 12. Vitousek PM, Naylor R, Crews T, David MB, Drinkwater LE, Holland E. (2009) Nutrient imbalances in  
226 agricultural development. *Science* 324:1519–1520.
- 227 13. Jin J, Wang G, Liu X, Pan X, Herbert SJ, Tang C. (2006) Interaction between phosphorus nutrition and  
228 drought on grain yield, and assimilation of phosphorus and nitrogen in two soybean cultivars differing in  
229 protein concentration in grains. *J Plant Nutr* 29:1433–1449.
- 230 14. Hartwig UA, Drevon JJ. (1997) Phosphorus deficiency increases the argon- induced decline of nodule  
231 nitrogenase activity in soybean and alfalfa. *Planta* 201:463–469.

- 232 15. Almeida, Jose PF. (2000) Evidence that P deficiency induces N feedback regulation of symbiotic N<sub>2</sub>  
233 fixation in white clover (*Trifolium repens* L.). *J Exp Bot* 51:1289–1297.
- 234 16. Tang C, Hinsinger P, Drevon JJ, Jaillard B. (2001) Phosphorus deficiency impairs early nodule  
235 functioning and enhances proton release in roots of *Medicago truncatula* L. *Ann Bot-London* 88:0–138.
- 236 17. Krueger K, Goggi AS, Mallarino AP, Mullen RE. (2013) Phosphorus and potassium fertilization effects  
237 on soybean seed quality and composition. *Crop Sci* 53:602–610.
- 238 18. Kawasaki Y, Tanaka Y, Katsura K, Purcell LC, Shiraiwa T. (2016) Yield and dry matter productivity of  
239 Japanese and US soybean cultivars. *Plant Prod Sci* 19:257–266.
- 240 19. National Bureau of Statistics of China. (2017) *China Statistical Yearbook*. Beijing: China Statistics Press  
241 (in Chinese).
- 242 20. *China Agriculture Yearbook*. (2015) Beijing: China Agriculture Press (in Chinese).
- 243 21. Marchiol L, Miceli F, Pinosa M, Zerbi G. (1992) Intercropping of soybean and maize for silage in  
244 Northern Italy: effect of nitrogen level and plant density on growth, yield and protein content. *Eur J*  
245 *Agron* 1:207–211.
- 246 22. Chen Z, Mackenzie AF, Fanous MA. (1992) Soybean nodulation and grain yield as influenced by  
247 N-fertilizer rate, plant population density and cultivar in southern Quebec. *Can J Plant Sci* 72:  
248 1049–1056.
- 249 23. Hu MX, Wiatrak P. (2012) Effect of planting date on soybean growth, yield, and grain quality: Review.  
250 *Agron J* 104:785–790.
- 251 24. Mall RK, Lal M, Bhatia VS, Rathore LS, Singh R. (2004). Mitigating climate change impact on soybean  
252 productivity in India: a simulation study. *Agr Forest Meteorol* 121:0–125.
- 253 25. Egli DB, Bruening W. (1992) Planting date and soybean yield: evaluation of environmental effects with

- 254 a crop simulation model: SOYGRO. *Agr Forest Meteorol* 62:19–29.
- 255 26. Tietze W, Domrs M. (1987). The climate of China. *Geo J* 14:265–266.
- 256 27. Abbasi MK, Tahir MM, Azam W, Abbas Z, Rahim N. (2012) Soybean yield and chemical composition  
257 in response to phosphorus–potassium nutrition in Kashmir. *Agron J* 104:1476–1484.
- 258 28. Anjum MS, Ahmed ZI, Rauf CA. (2006) Effect of Rhizobium inoculation and nitrogen fertilizer on yield  
259 and yield components of mungbean. *Int J Agri Biol* 8:238–240.
- 260 29. Marenya PP, Barrett CB. (2009) State-conditional fertilizer yield response on Western Kenyan farms.  
261 *Am J Agr Econ* 91:991–1006.
- 262 30. Li ST, Jin JY. (2011) Characteristics of nutrient input/output and nutrient balance in different regions of  
263 China. *Sci Agric Sin* 44(20):4207–4229(in Chinese).
- 264 31. Zhang S, Huffman T, Zhang X, Liu W, Liu Z. (2014) Spatial distribution of soil nutrient at depth in  
265 black soil of Northeast China: a case study of soil available phosphorus and total phosphorus. *J Soil*  
266 *Sediment* 14:1775–1789.
- 267 32. Earl KD, Syres JK, Mclanghlin JR. (1979) Origin of the effects of tartrate and acetate on phosphate  
268 sorption by soil and synthetic gels. *Soil Sci Soc Am J* 43:674–678.
- 269 33. Ma X, Wu Z, Chen L, Zhou B, Gao Z, Hao X, Zhang J. (2014). Effect of long-term fertilization on the  
270 phosphorus content of black soil in Northeast China. *Acta Agr Scand B-S P* 63:156–161.
- 271 34. Ayaga G, Todd A, Brookes PC. (2006) Enhanced biological cycling of phosphorus increases its  
272 availability to crops in low-input sub-Saharan farming systems. *Soil Biol Biochem* 38:81–90.
- 273 35. Drevon JJ, Hartwig UA. (1997) Phosphorus deficiency increased the argon- induced decline of nodule  
274 nitrogenase activity in soybean and alfalfa. *Planta* 201:463–469.
- 275 36. Ramesh A, Sharma SK, Joshi OP, Khan IR. (2011). Phytase, phosphatase activity and P-nutrition of

- 276 soybean as influenced by inoculation of Bacillus. *Indian J Microbiol* 51:94–99.
- 277 37. Miller RJ, Pesek JT, Hanway JJ. (1964) Soybean yields and plant composition as affected by phosphorus  
278 and potassium fertilizer. *Res Bull (Iowa Agric Home Econo Exp Station)* 1964:52–68.
- 279 38. Egli DB. (1988) Plant density and soybean yield. *Crop Sci* 28:977–981.
- 280 39. Zhou CY. (2017) High-yield and high-efficiency cultivation techniques of soybean under the condition  
281 of returning wheat straw to field. *Modern Agr Technol* 10:35–36 (in Chinese).
- 282 40. Zhang FS, Chen XP, Vitousek P. (2013) Chinese agriculture: An experiment for the world. *Nature* 497:  
283 33–35.
- 284 41. Xu XP, He P, Pampolino MF, Chuan LM, Johnston AM, SJ Qiu, et al. (2013) Nutrient requirements for  
285 maize in China based on QUEFTS analysis. *Field Crops Res* 150:115–125.
- 286 42. Wu LQ, Chen XP, Shi XJ, Jiang RF, Chui ZL, Cai GX, et al. (2013) Application of region formulation  
287 fertilizer technology based on “Regional Fertilizer Formula and Site Specific Adjustment”. *Phosphate*  
288 *and Compound Fertilizer* 28:68–70 (in Chinese).
- 289

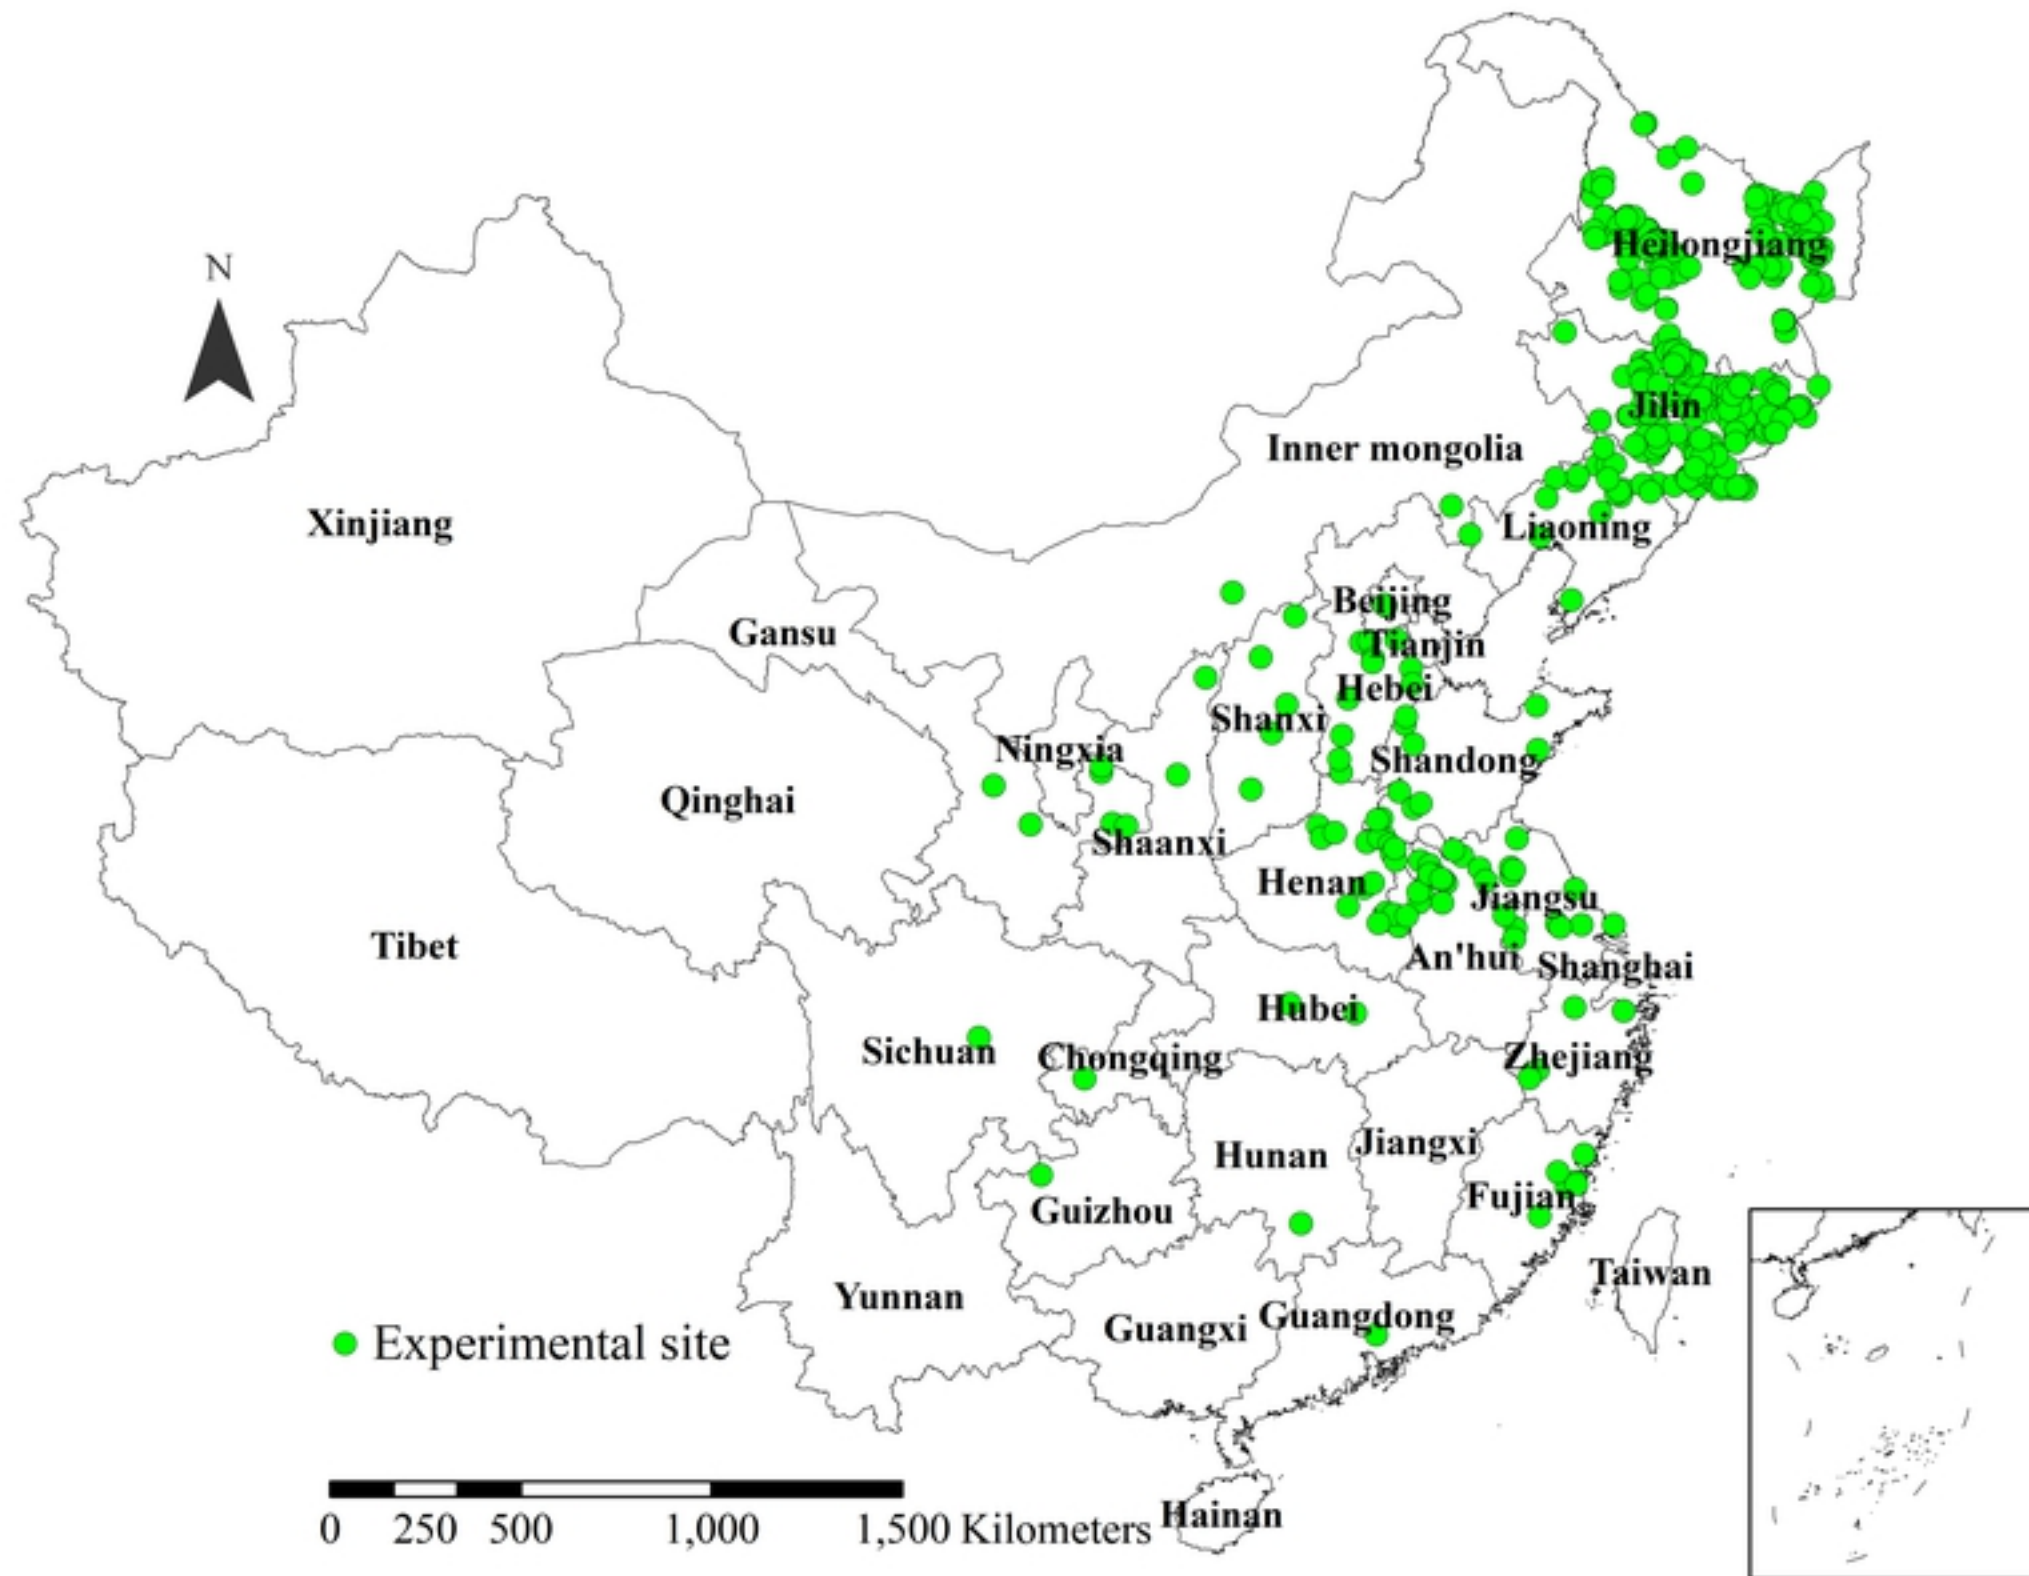

Figure 1



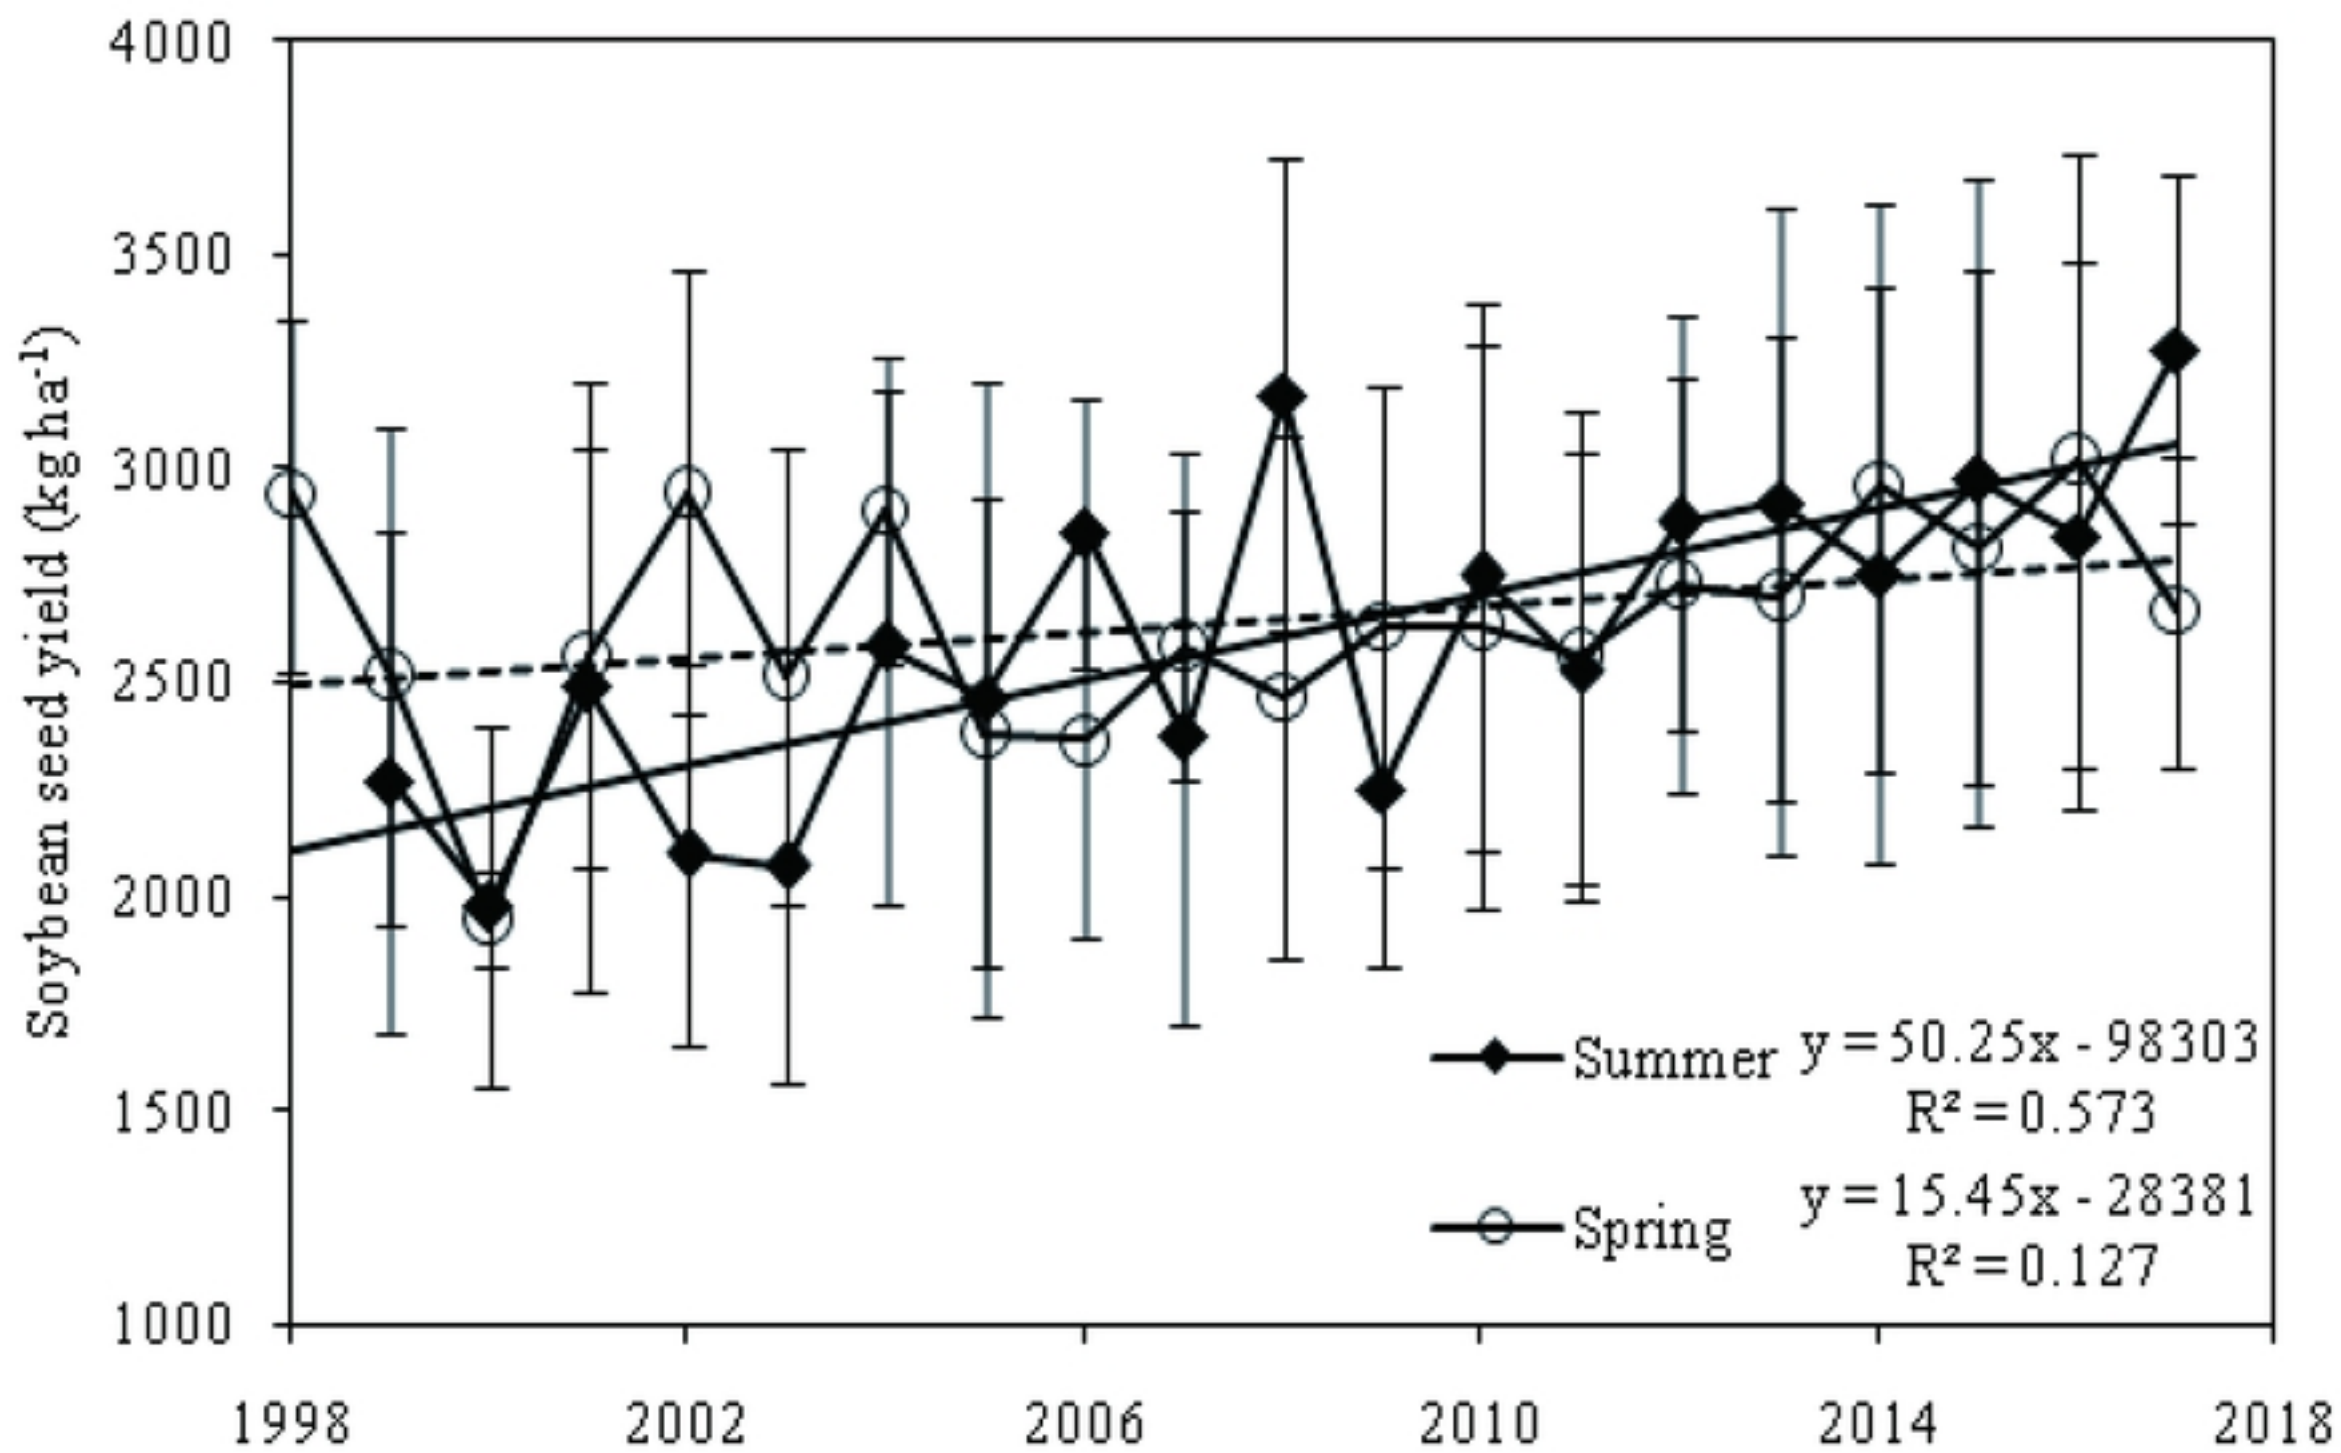

Figure 2

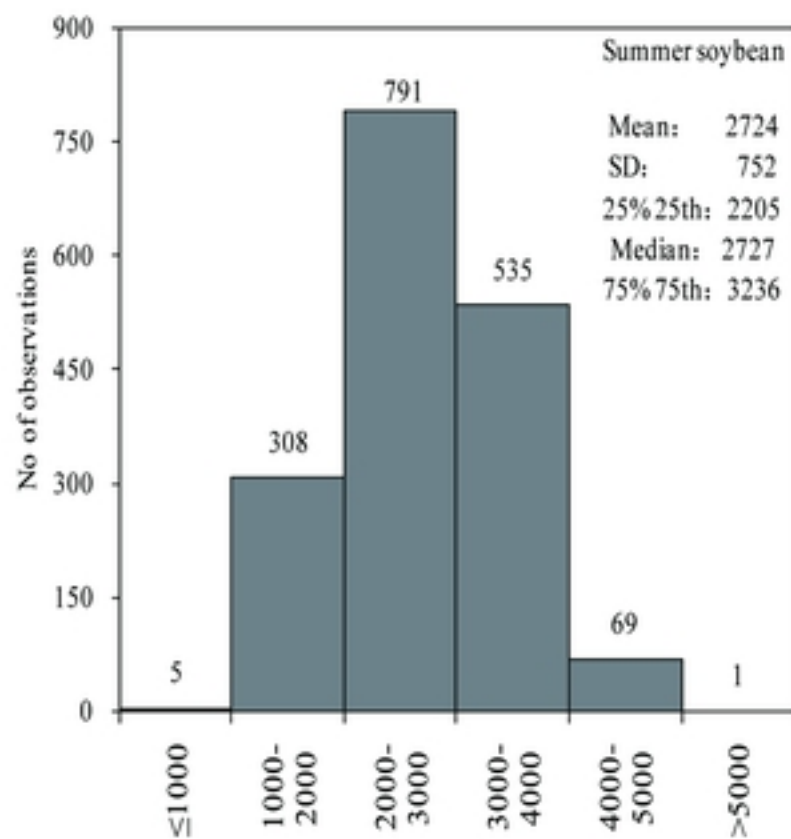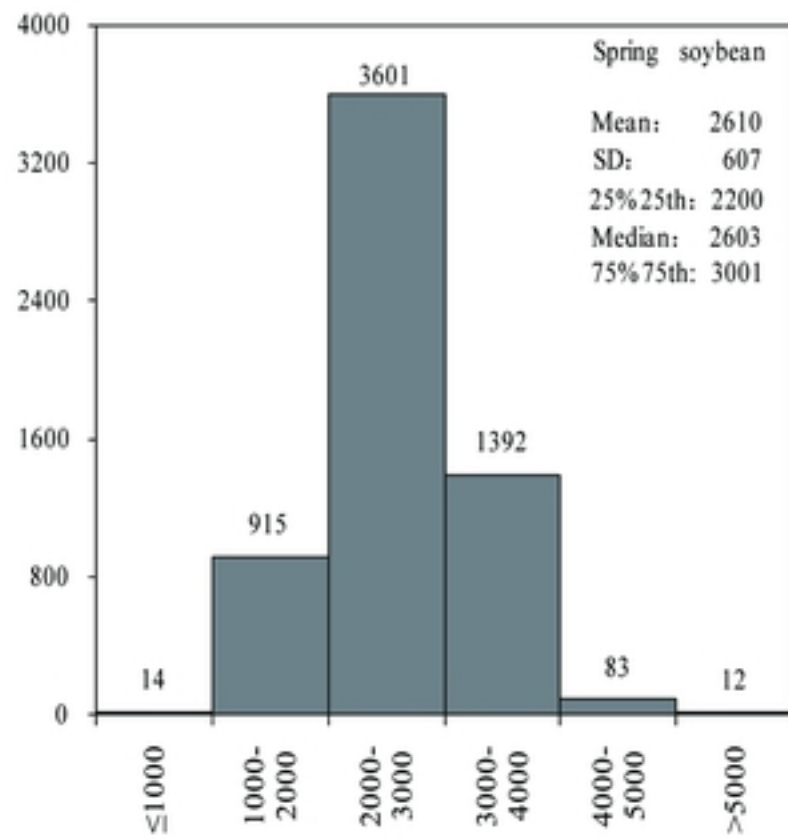

Figure 3

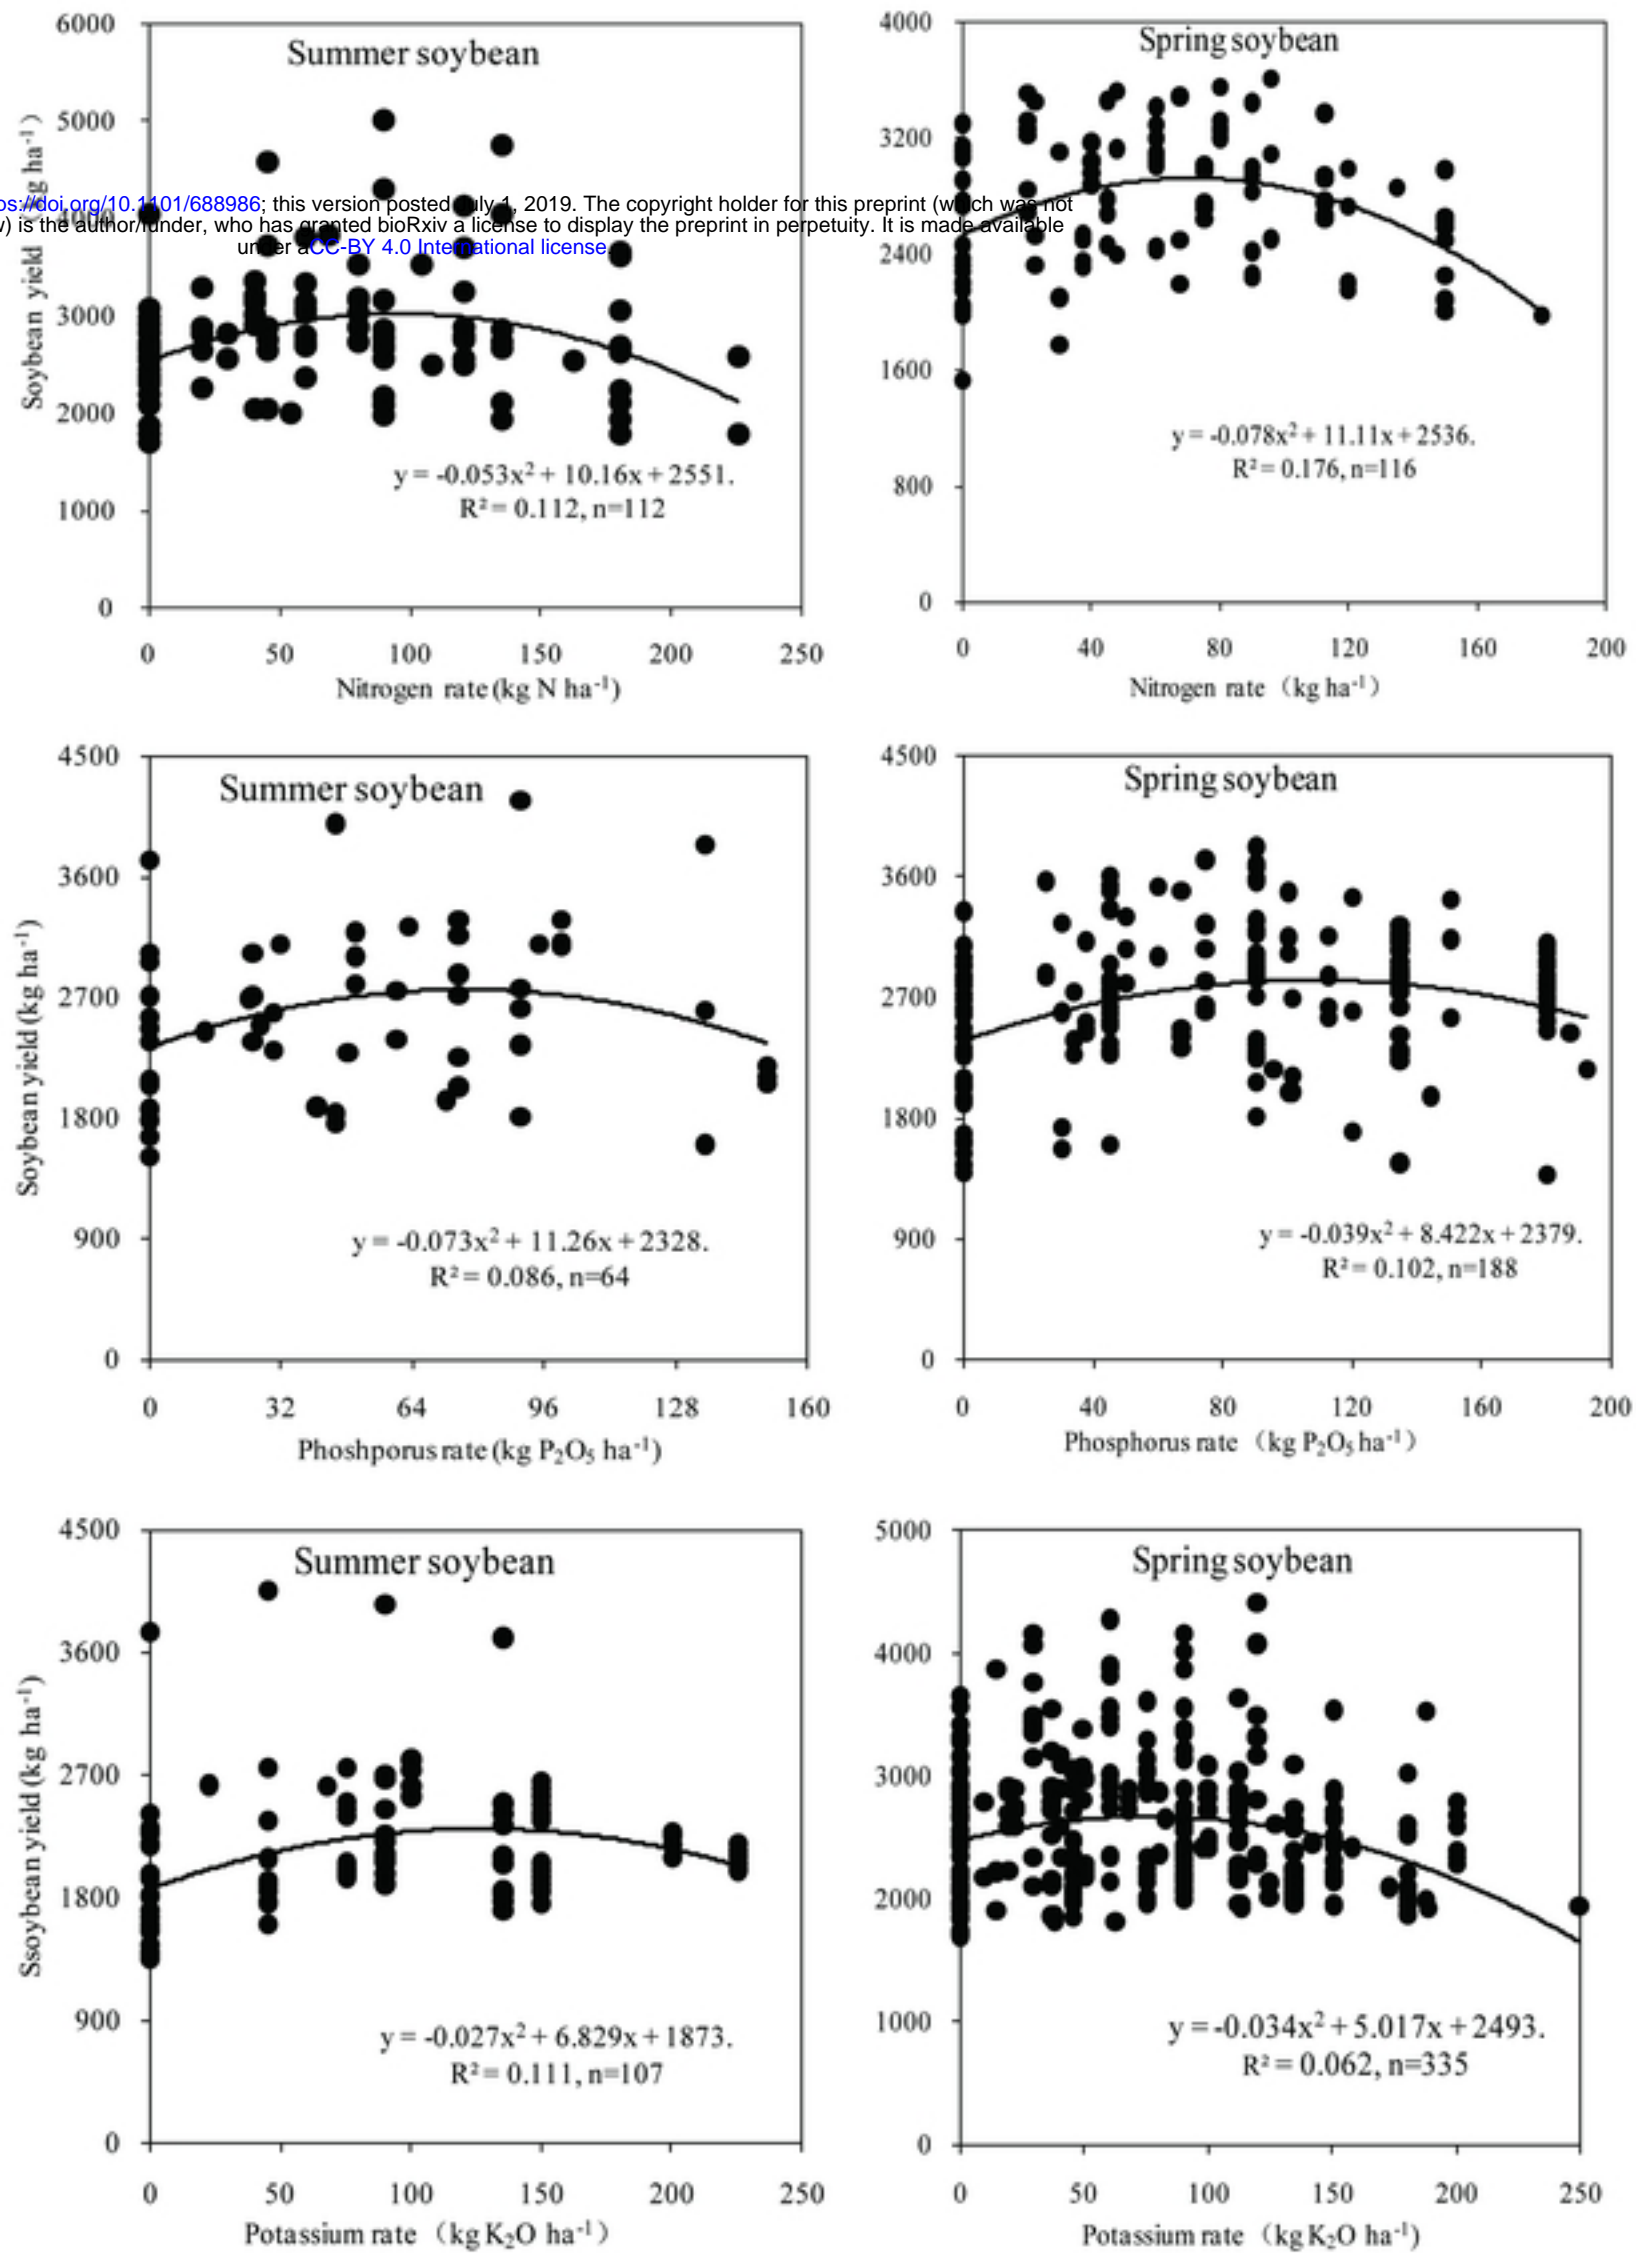

Figure 4

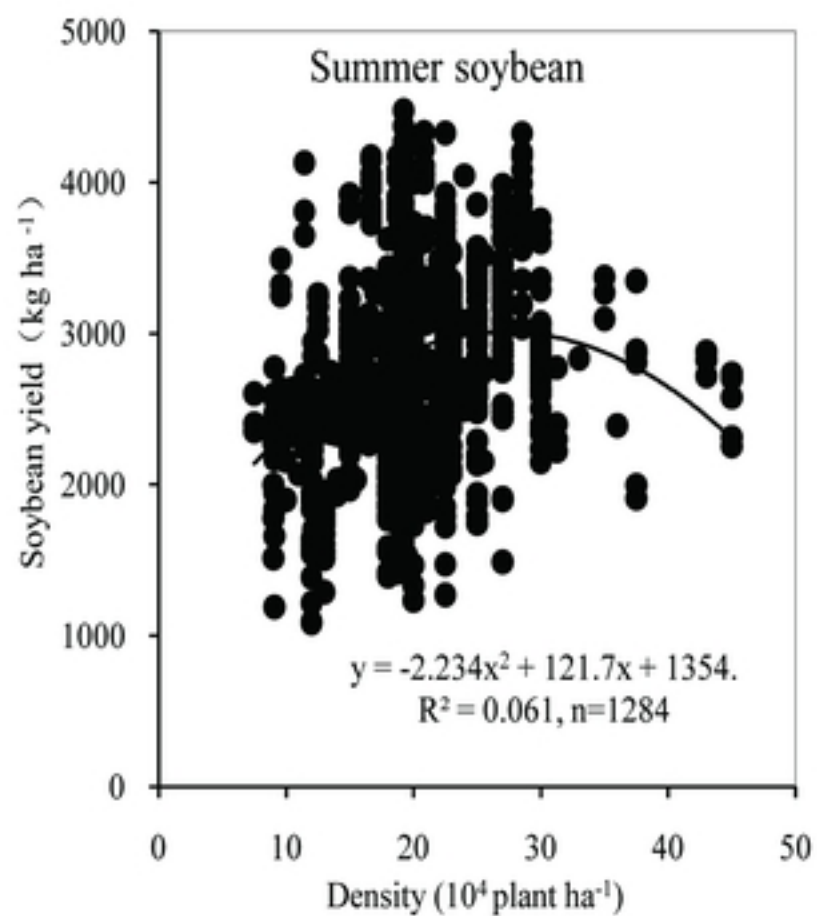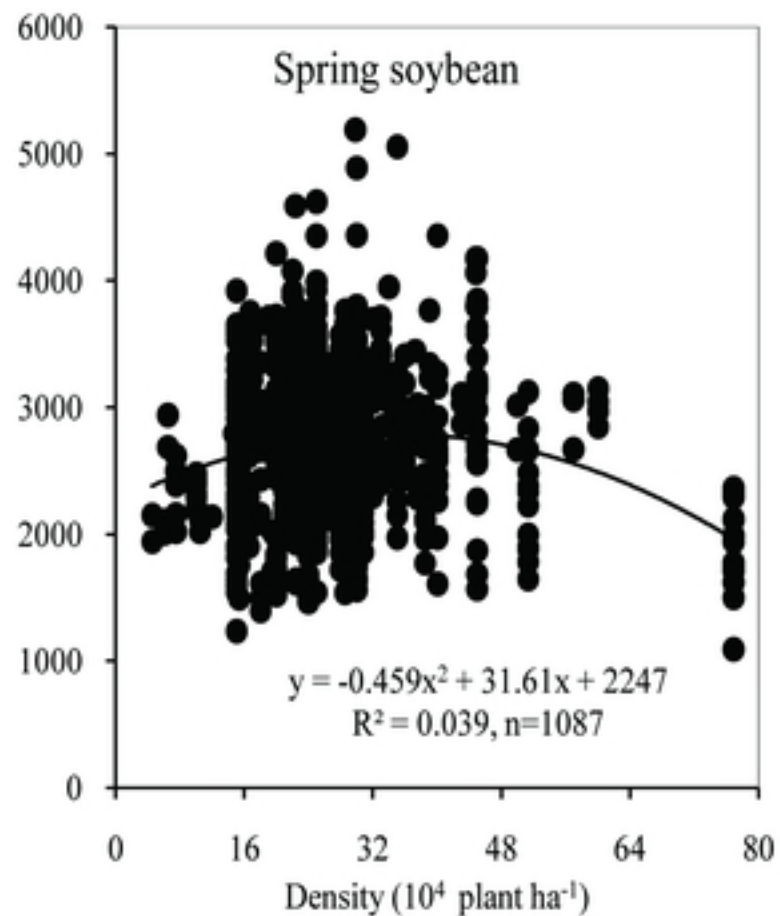

Figure 5
